# Supplementary material
Source: PubMed Central journal article supplement (PMC2262172)

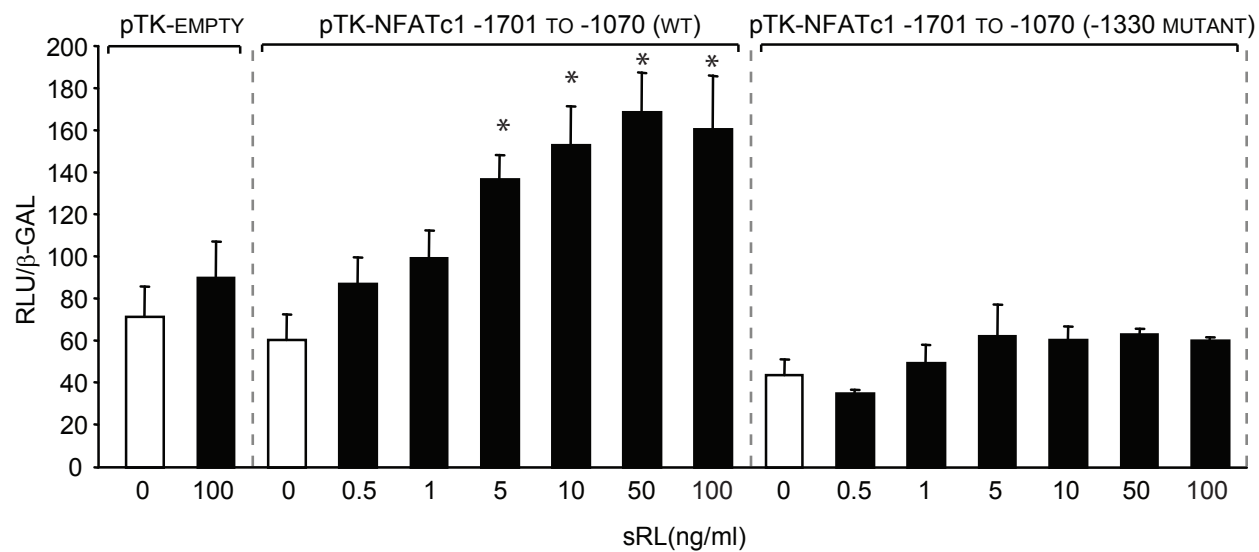

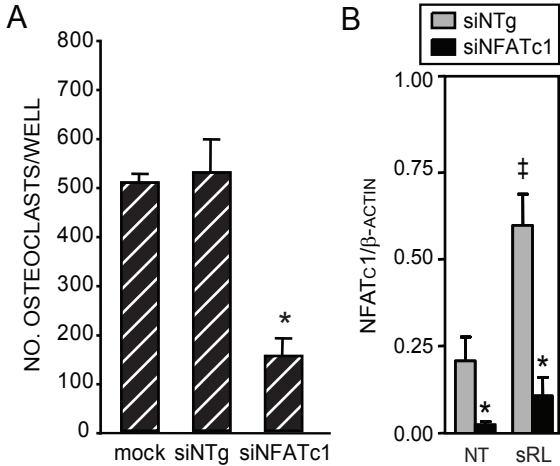

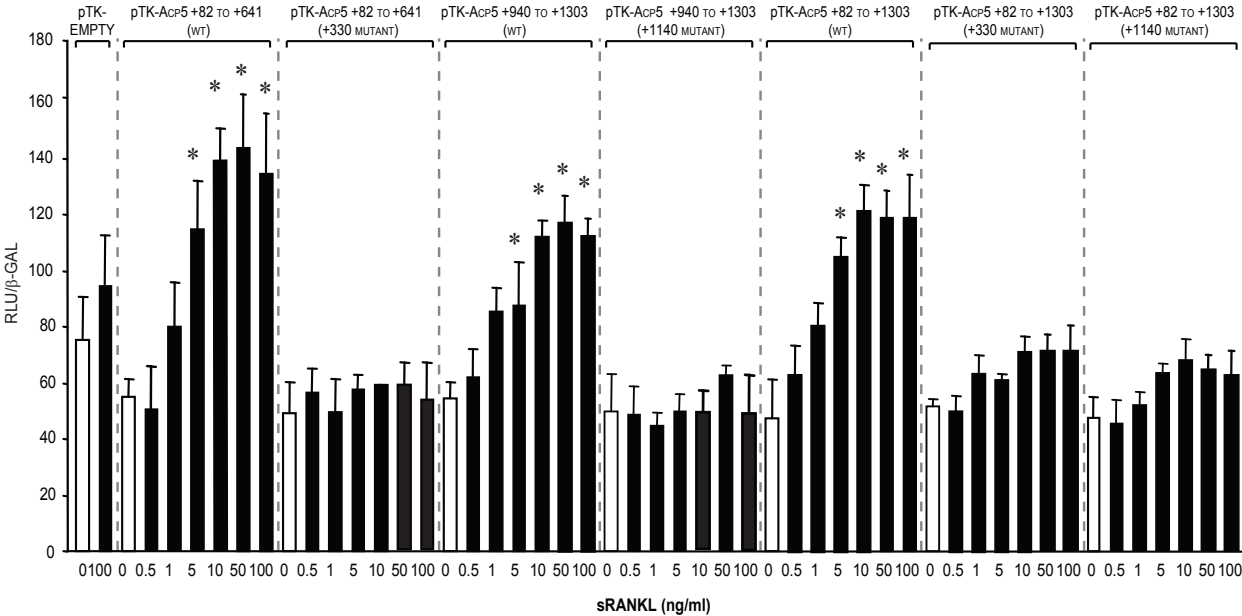

Supplement: mend_me.2007-0333_1.pdf [file mend_me.2007-0333_1.pdf]
